# Supplementary material for: Lipid response patterns in acute phase paediatric Plasmodium falciparum malaria
Source: PubMed Central journal article supplement (PMC5323494; doi:10.1007/s11306-017-1174-2), 2017-02-23
Supplement: 11306_2017_1174_MOESM1_ESM.pdf [file 11306_2017_1174_MOESM1_ESM.pdf]

## Lipid response patterns in acute phase paediatric *P. falciparum* malaria

### SUPPLEMENTARY MATERIAL

Judy Orikiiriza<sup>1,2,3,\*</sup>, Izabella Surowiec<sup>4\*</sup>, Elisabeth Lindquist<sup>5</sup>, Mari Bonde<sup>6</sup>, Jimmy Magambo<sup>3</sup>,

Charles Muhinda<sup>3,7</sup>, Sven Bergström<sup>5,8,9</sup>, Johan Trygg<sup>4+</sup>, Johan Normark<sup>5,6,9,10+</sup>

1. Infectious Diseases Institute, College of Health Sciences, Makerere University, P.O. Box 22418, Kampala, Uganda
2. Department of Immunology, Institute of Molecular Medicine, Trinity College Dublin, St. James's Hospital, Dublin 8, Ireland
3. Rwanda Military Hospital, P.O. Box: 3377, Kigali, Rwanda
4. Computational Life Science Cluster (CLiC), Department of Chemistry, Umeå University, 901 87 Umeå, Sweden
5. Department of Molecular Biology, Umeå University, 901 87 Umeå, Sweden
6. Department of Chemistry, Umeå University, 901 87, Umeå, Sweden
7. Department of Immunology and Microbiology, School of Biomedical Sciences College of Health Sciences, Makerere University, P.O Box 7072, Kampala, Uganda
8. Laboratory for Molecular Infection Medicine Sweden (MIMS), 901 87 Umeå, Sweden
9. Umeå Center for Microbial Research, 901 87 Umeå, Sweden
10. Division of Infectious Diseases, Department Clinical Microbiology, Umeå University, 901 87 Umeå, Sweden

\*,+ These authors contributed equally to the work

Corresponding author: Johan Normark

Department of Molecular Biology, Umeå University, SE-901 87 Umeå, Tel: +46-(0)90 7850811, Fax:

+ 46-(0)90 772630, Email: johan.normark@umu.se

### *Patient selection*

A total of 690 patients, between six months and six years of age were enrolled from January 2011 to September 2013 at Nyagatare Hospital in Nyagatare district, Kiziguro and Ngarama Hospital in Gatsibo district or health centres in the catchment areas of these three hospitals in the Eastern Province of Rwanda. We applied a multivariate design approach <sup>1</sup> to select samples representative for the whole cohort of patients consisting from 221 severe malaria, 233 mild malaria and 236 controls. The multi-dimensional clinical data were used as basis for representative selection of the patients. PCA modelling was used to summarize clinical data into a low-dimensional hyper plane, which was visualized as a score scatter plot. Two factorial, full factorial design was applied to Principal Component Analysis (PCA) plots of two-component models with clinical data as X variables. In each of the four corners of the scatter plot, two samples (patients) were selected along with two center points. This procedure was repeated for each gender and each disease category, resulting in a total of 60 samples selected for further investigation. In this way we selected representative samples of the multivariate space (defined as samples and clinical variables related to them). Variables that were not numerical were transformed into discrete variables. Only variables that differed between samples and contained more than two values different from median were used. Patients presenting with jaundice and those with a known history of antimalarial treatment before sampling were excluded from the selection process. Age, height, weight and head circumference were highly correlated to each other and caused bias in the models, hence only age was included in the full factorial design selection of samples. This was also the case regarding systolic and diastolic blood pressure where only systolic pressure was included.

### *Lipidomics analysis*

For lipidomics analysis, plasma was thawed on ice and 110  $\mu\text{L}$  of extraction mixture (chloroform/methanol (2:1, v/v) with nine internal standards (PA(17:0/17:0), PG(17:0/17:0), PE(17:0/17:0), PG(17:0/0:0/0:0), DG(17:0/17:0/0:0), TAG(17:0/17:0/17:0), PC(17:0/0:0), PC(19:0/19:0) and TAG(17:0/17:0/17:0)-13C<sub>3</sub>; final concentration of the standards in the samples was from 1 to 20 ng/ $\mu\text{L}$ , was added to 20  $\mu\text{L}$  of plasma; then extraction was carried out using a MM301 vibration Mill (Retsch GmbH & Co. KG, Haan, Germany) at a frequency of 30 Hz for 2 min. The samples were left in room temperature for 60 min and thereafter centrifuged at 14 000 rpm for 3 min at 4°C. A 50  $\mu\text{L}$  aliquot of lower phase was transferred to LC vial, 70  $\mu\text{L}$  of chloroform/methanol (2:1, v/v) mixture was added and samples were shaken briefly before being analysed with LCMS-QTOF.

One  $\mu\text{L}$  of each sample was injected into an Agilent UPLC system (Infinity 1290) equipped with a UPLC column (Acquity CSH, 2.1 x 50 mm, 1.7  $\mu\text{m}$  C18 in combination with a 2.1 mm x 5 mm, 1.7  $\mu\text{m}$  VanGuard CSH precolumn; Waters Corporation, Milford, MA, USA). The UPLC system was coupled to an Agilent 6540 iFunnel Jet stream electrospray ion source (Agilent Technologies, Santa Clara, CA, USA). Mobile phases used were 60:40 ACN:water + 10 mM ammonium formate + 0.1% formic Acid (A) and 89.1:10.5:0.4 IPA:ACN:water + 10 mM ammonium formate + 0.1% formic acid (B). The following gradient was used: 0.0 - 15 % B at a flow rate of 0.5 mL/min, then B was increased to 30 % during 1.2 min, then to 55% during 0.3 min and held at 55 % for 3.5 min, then to 72% during 2 min, to 85% during 2.5 min and to 100% during 0.5 min where was held at 0.5 ml/min flow rate for additional 2 minutes after which flow rate was increased to 5ml/min and kept for 0.5 min to wash the injection valve. No MS data were acquired during washing and equilibration steps. Column was equilibrated at 0.5 ml/min

---

<sup>1</sup> Eriksson, L., et al., Multi- and megavariate data analysis. Basic Principles and applications. Third ed. 2013, Umea: UMETRICS AB. ISBN: 978-91-973730-5-0.

flow rate with 15% B for 1.5 min before next injection was done. Column oven temperature was held at 65°C and samples were kept in auto-sampler at 10°C. The analysis was done in positive ion mode.

A reference interface was connected for accurate mass measurements; the reference ions purine (4 µM) and HP-0921 (Hexakis(1H, 1H, 3H-tetrafluoropropoxy)phosphazine) (1 µM) both purchased from Agilent Technologies (Santa Clara, CA, USA) were infused directly into the MS at a flow rate of 0.08 mL/min for internal calibration, and the monitored ions were purine  $m/z = 121.05$  and HP-0921  $m/z = 922.0098$ . The gas temperature was set to 300°C, the drying gas flow to 8 L/min and the nebulizer pressure 40 psi. The sheath gas temp was set to 350°C and the sheath gas flow to 11 L/min. The capillary voltage was set to 4000 V in positive ion mode. The nozzle voltage was 0 V. The fragmentor voltage was 100 V, the skimmer 45 V and the OCT 1 RF Vpp 750 V. The collision energy was set to 0 V. The  $m/z$  range was 70 - 1700, and data were collected in centroid mode with an acquisition rate of 4 scans/s.

Table S1. Clinical information for the control patients included in the study (\*). In bold marked samples analyzed for endocannabinoids content (see Methods section).

| Study code     | Age         | Gender | Blood pressure | HC in cm | Weight in kg | Height in cm | MUAC in cm | Temperature | Pulse rate | Breathing rate | Date of recruitment |
|----------------|-------------|--------|----------------|----------|--------------|--------------|------------|-------------|------------|----------------|---------------------|
| <b>NYC-76</b>  | 1 YR 1 MON  | M      | 90/70          | 46       | 8            | 76           | 15         | 36.7        | 112        | 24             | 17/08/2012          |
| <b>NYC-112</b> | 1 YR 1 MON  | F      | 100/80         | 51       | 13           | 89           | 17         | 37.4        | 98         | 24             | 22/08/2012          |
| <b>NYC-117</b> | 5 YR        | F      | 100/85         | 49       | 20           | 117          | 16         | 37.2        | 92         | 24             | 22/08/2012          |
| <b>NYC-118</b> | 2 YR        | M      | 110/75         | 51       | 12           | 98           | 16         | 37.4        | 102        | 24             | 22/08/2012          |
| <b>NYC-123</b> | 2 YR 6 MON  | F      | 120/85         | 49       | 14           | 93           | 17         | 37          | 94         | 20             | 22/08/2012          |
| <b>NYC-141</b> | 3 YR        | M      | 118/69         | 51       | 13           | 90           | 16         | 36.4        | 99         | 25             | 06/12/2012          |
| <b>NYC-144</b> | 2 YR 11 MON | F      | NA             | 51       | 13           | 91           | 16         | 36.4        | 107        | 26             | 06/12/2012          |
| <b>NYC-150</b> | 2 YR 6 MON  | F      | NA             | 47       | 13           | 89           | 17         | 36.9        | 106        | 24             | 07/12/2012          |
| <b>NYC-161</b> | 4YR         | M      | 100/70         | 50.5     | 13           | 95           | 15         | 36.3        | 101        | 12             | 18/04/2013          |
| <b>NYC-177</b> | 2 YR 6 M    | F      | 100/50         | 47       | 10           | 87           | 15         | 36.5        | 120        | 22             | 24/04/2013          |
| <b>NYC-178</b> | 5 YR        | M      | 115/90         | 50       | 15           | 90           | 17         | 36.36       | 104        | 34             | 24/04/2013          |
| <b>NYC-180</b> | 2 YR        | M      | 90/90          | 48       | 9            | 84           | 14         | 36.1        | 100        | 30             | 25/04/2013          |
| <b>NYC-184</b> | 3 YR 7M     | M      | 100/70         | 51       | 15           | 100          | 16         | 36.96       | 50         | 24             | 25/05/2013          |
| <b>NYC-189</b> | 4 YR        | F      | 115/70         | 48.5     | 15           | 106          | 15.5       | 36.5        | 94         | 18             | 26/04/2013          |
| <b>NYC-214</b> | 5 YR 3 M    | M      | 122/96         | 52       | 21           | 115          | 16         | 36.9        | 102        | 26             | 08/07/2013          |
| <b>NYC-215</b> | 5 YR 6 M    | F      | 124/98         | 52       | 18           | 105          | 15         | 36.6        | 84         | 24             | 07/08/2013          |
| <b>NYC-216</b> | 4YR         | F      | 108/86         | 51       | 18           | 105          | 16         | 36.7        | 94         | 24             | 07/08/2013          |
| <b>NYC-231</b> | 3 YR 6 M    | F      | NA             | 51       | 16           | 99           | 17         | 37          | NA         | NA             | 23/12/2013          |
| <b>NYC-232</b> | 4 YR        | M      | 100/80         | 53       | 17           | 102          | 19         | 37          | 89         | 21             | 23/12/2013          |
| <b>NYC-249</b> | 6M          | M      | 100/70         | 49       | 19           | 118          | 16         | 36.8        | 84         | 19             | 01/05/2014          |

(\*) All children except NYC-189 were vaccinated and had negative or unknown HIV serostatus., NA – not assessed; HC - head circumference; MUAC - mid-upper arm circumference

Table S2. Clinical information for the mild malaria patients included in the study. In bold marked samples analyzed for endocannabinoids content (see Methods section).

| Study code        | Age (months) | Gender | Vaccination status | Blood pressure | HC in cm | Weight in kg | Height in cm | MUAC in cm | Temperature | Pulse rate | Breathing rate | Length of current illness in days | Parasitemia (%) | Other illness    | Other symptoms                   | Other symptoms (2) | Treatment received before coming to hospital | Date of recruitment |
|-------------------|--------------|--------|--------------------|----------------|----------|--------------|--------------|------------|-------------|------------|----------------|-----------------------------------|-----------------|------------------|----------------------------------|--------------------|----------------------------------------------|---------------------|
| <b>NGM-23</b>     | 33           | M      | NA                 | NA             | 50       | 10           | NA           | 16         | 38.5        | 72         | 28             | 3                                 | 1.25            | URTI+ AWD        | Watery stool                     | *                  |                                              | 29/04/2011          |
| <b>NYM-33</b>     | 26           | M      | NA                 | 100/60         | 50       | 17           | 89           | 16         | 38.6        | 72         | 20             | 4                                 | 4.02            | Flu              |                                  | *                  | Antipyretics, cough medicine                 | 07/05/2011          |
| <b>NYM-40</b>     | 23           | F      | NA                 | 98/60          | 49       | 14           | 87           | 18         | 38.9        | 72         | 20             | 2                                 | 0.58            |                  | Nausea, loss of appetite         |                    | Antipyretics                                 | 12/05/2011          |
| <b>NYM-47****</b> | 13           | F      | NA                 | 97/55          | 46       | 12           | 71           | 14         | 38.9        | 72         | 20             | 3                                 | 0.37            | Skin lesions     | Shivering, vomiting              | *                  |                                              | 19/05/2011          |
| <b>NYM-55</b>     | 53           | M      | NA                 | NA             | 42       | 18           | 100          | NA         | 39          | 100        | 24             | 2                                 | 1.39            |                  |                                  | *                  |                                              | 09/03/2012          |
| <b>NYM-56</b>     | 60           | M      | NA                 | NA             | 54       | 19           | 117          | NA         | NA          | 98         | 22             | NA                                | 0.94            |                  | Vomiting                         | *, ^               | Cotrimoxazole                                | 09/03/2012          |
| <b>NYM-61</b>     | 45           | M      | NA                 | 95/60          | 50.5     | 12           | 95           | NA         | NA          | 120        | 22             | 4                                 | 0.58            |                  |                                  | *                  |                                              | 18/04/2012          |
| <b>NYM-87</b>     | 60           | F      | NA                 | 85/50          | 53.5     | 22           | 130          | NA         | 39.54       | 130        | 36             | 3                                 | 1.9             |                  | Headache, anorexia               | *                  |                                              | 02/05/2012          |
| <b>NYM-108</b>    | 48           | F      | NA                 | 90/60          | 49       | 15           | 98           | 14         | 37.08       | 98         | 28             | 1                                 | 1.14            |                  |                                  |                    |                                              | 16/05/2012          |
| <b>NYM-129</b>    | 49           | M      | NA                 | 90/60          | 51       | 15           | 100          | 14         | 36.8        | 138        | 30             | 3                                 | 0.17            |                  | Abdominal pain, loss of appetite | *                  |                                              | 27/06/2012          |
| <b>NYM-142</b>    | 51           | F      | YES                | 110/80         | 53       | 17           | 100          | 15         | 39.1        | 130        | 26             | 1                                 | 3.7             |                  | Headache                         |                    |                                              | 04/07/2012          |
| <b>NYM-147</b>    | 48           | M      | YES                | 100/50         | 49       | 11           | 91           | 13.5       | 36.7        | 120        | 26             | 1                                 | 1.38            |                  |                                  | *                  |                                              | 06/07/2012          |
| <b>NYM-151</b>    | 48           | F      | YES                | 110/80         | 48       | 15           | 96           | 17         | 36.3        | 95         | 20             | 2                                 | NA              |                  | Headache                         |                    |                                              | 07/07/2012          |
| <b>NYM-155</b>    | 39           | M      | YES                | 100/70         | 51.5     | 15           | 95           | 17         | 37.1        | 100        | 26             | 1                                 | NA              |                  | Shivering, chills                | *                  |                                              | 09/07/2012          |
| <b>NYM-160</b>    | 25           | F      | YES                | 85/60          | 48       | 10           | 80           | 14         | 37          | 104        | 24             | 2                                 | 0.89            |                  |                                  |                    |                                              | 11/07/2012          |
| <b>NYM-183</b>    | 66           | M      | YES                | 90/55          | 52       | 18           | 109          | 15         | 37.5        | 118        | 20             | 1                                 | 2.34            | Intestinal worms | Abdominal pain, headache         | ** , ^             |                                              | 02/08/2012          |
| <b>NYM-196</b>    | 48           | M      | YES                | 110/79         | 49       | 17           | 94           | 16         | 38.5        | 98         | 21             | 1                                 | NA              |                  |                                  | *                  |                                              | 05/12/2012          |
| <b>NYM-211</b>    | 62           | F      | YES                | NA             | 50       | 14           | 104          | 15         | 36.59       | 100        | 22             | 3                                 | 1.32            | Tonsillitis      |                                  |                    |                                              | 09/12/2012          |
| <b>NYM-215</b>    | 72           | F      | YES                | 115/80         | 50.5     | 20           | 106          | 17         | 38.3        | 106        | 28             | 1                                 | 1.17            |                  |                                  | *, ** , ****, ~    |                                              | 17/12/2012          |
| <b>NYM-229</b>    | 60           | F      | YES                | 120/70         | 5        | 18           | 113          | 16.5       | 39          | 170        | 60             | 2                                 | 1.3             |                  | Stomach ache                     |                    | Anti-bacterial                               | 05/03/2012          |

\* - cough

\*\* - diarrhea

\*\*\* - signs of dehydration

^ - splenomegaly

~ - dry mucus membrane

NA – not assessed

\*\*\*\* - patient excluded from the study

HC - head circumference

MUAC - mid-upper arm circumference

Table S3. Clinical information for the severe malaria patients included in the study. In bold marked samples analyzed for endocannabinoids content (see Methods section).

| Study code     | Age (months) | Gender | Vaccination status | Blood pressure | HC in cm | Weight in kg | Height in cm | MUAC in cm | Temperature | Pulse rate | Breathing rate | Blantyre coma scale | Length of current illness in days | Parasitemia (%) | Other illness          | Other symptoms             | Other symptoms (2)               | Treatment received before coming to hospital | Date of recruitment | Severe malaria subgroup (*) |
|----------------|--------------|--------|--------------------|----------------|----------|--------------|--------------|------------|-------------|------------|----------------|---------------------|-----------------------------------|-----------------|------------------------|----------------------------|----------------------------------|----------------------------------------------|---------------------|-----------------------------|
| <b>NYS-33</b>  | 51           | F      | NA                 | 90/60          | 45       | 12           | 100          | 14         | 40.09       | 162        | 52             | 5                   | 2                                 | 0.4             |                        | Abdominal pain, headache   | * , °°° , *** , °° (s)           |                                              | 16/05/2012          | RD                          |
| <b>NYA-69</b>  | 27           | M      | YES                | 90/60          | 48       | 11           | 86           | 14         | 38          | 118        | 26             | 5                   | 3                                 | 6.58            |                        |                            | ° , *** , ~ (s)                  |                                              | 12/07/2012          | SA                          |
| <b>NYS-87</b>  | 36           | F      | YES                |                | 47       | 13           | 87           | 16         | 39.97       | 120        | 29             | 5                   | 6                                 | 26.62           |                        | Prostation                 | ** , ° , ~ (s)                   |                                              | 08/12/2012          | RD                          |
| <b>NYS-106</b> | 56           | F      | YES                | 100/74         | 50.5     | 13           | 44           | 14.2       | 36.69       | 102        | 26             | 5                   | 1                                 | 9.88            | Typhoid fever          |                            | ° , *** , (n)                    |                                              | 13/12/2012          | HYP                         |
| <b>NYS-110</b> | 18           | F      | YES                |                | 46       | 14           |              | 17.5       | 36.18       | 116        | 30             | 5                   | 1                                 | 12.47           |                        |                            | * , ** , ~ , ° , ~ , °° , (n)    |                                              | 17/12/2012          | HYP                         |
| <b>NYA-112</b> | 48           | M      | YES                | 108/78         | 52       | 18           | 104          | 16         | 38.4        | 96         | 24             | 5                   | 2                                 | 5.45            | Traditional uvulectomy | Abdominal discomfort       | ° , (n)                          | Amoxycycline                                 | 18/12/2012          | HYP                         |
| <b>NYS-117</b> | 48           | M      | YES                |                | 50       | 18           | 103          | 16         | 39.8        | 110        | 30             | 5                   | 2                                 | 15.02           |                        | Restlessness, irritability | ° , °° (s)                       |                                              | 20/12/2012          | HYP                         |
| <b>NYS-121</b> | 29           | M      | YES                |                | 51       | 13           | 92           | 13.5       | 35.7        | 140        | 30             | 5                   | 2                                 | 17.53           |                        | Vomiting                   | ^^ , ^^^ , ° (n)                 |                                              | 05/02/2013          | FC                          |
| <b>NYS-125</b> | 72           | F      | YES                | 120/50         | 50.5     | 15           | 107          | 14.5       | 39.4        | 190        | 60             | 5                   | 3                                 | 5.95            |                        | Abdominal pain             | * , ** , ^^ , ^^^ , ~ (1) , (s)  | Ampicilin, paracetamol                       | 05/03/2013          | HG                          |
| <b>NYS-133</b> | 53           | M      | YES                | 110/76         | 51       | 12           | 96           | 16         | 38.2        | 122        | 26             | 5                   | 2                                 | 5.58            |                        | Vomiting                   | * , ** , ^^ , ~ (1) , ° (n)      | Traditional herbs                            | 16/05/2013          | PR                          |
| <b>NYS-138</b> | 56           | M      | YES                | 106/92         | 50       | 15           | 101          | 17         | 37          | 156        | 36             | 5                   | 1                                 | 2.7             | Pneumonia              | Lethargy, abdominal pain   | * , ^^ , ° , H , *** , ~ (s)     |                                              | 20/05/2013          | RD                          |
| <b>NYS-139</b> | 24           | M      | YES                | 98/74          | 50       | 11           | 80           | 16         | 38.99       | 164        | 46             | 5                   | 1                                 | 10.6            | Intestinal parasites   | Vomiting                   | * , ** , ^^ , ^^^ , ° , H , (s)  |                                              | 20/05/2013          | FC                          |
| <b>NYS-140</b> | 55           | M      | YES                | 98/70          | 47       | 11           | 97           | 14         | 37.88       | 146        | 36             | 4                   | 2                                 | NA              |                        | Headache                   | * , ^^ , ~ (3) , W , (s)         |                                              | 20/05/2013          | CM                          |
| <b>NYS-141</b> | 62           | F      | NO                 | 106/92         | 51       | 17           | 115          | 16         |             | 138        | 24             | 5                   | 4                                 | 1.3             | Bronchitis             | Vomiting, shivers          | ^ , H , (n)                      |                                              | 22/05/2013          | NUD                         |
| <b>NYS-150</b> | 55           | F      | YES                | 118/98         | 50       | 15           | 106          | 15.5       | 38.5        | 164        | 34             | 5                   | 2                                 | 3.2             | Bronchitis             | Flue, abdominal pain       | * , ° (n)                        |                                              | 23/05/2013          | CM                          |
| <b>NYS-175</b> | 72           | M      | YES                | 118/94         | 50       | 22           | 113          | 17         | 39.3        | 160        | 44             | 5                   | 1                                 | 1.6             |                        | Headache, abdominal pain   | *                                |                                              | 13/07/2013          | NUD                         |
| <b>NYS-190</b> | 66           | M      | YES                | 110/90         | 52       | 19           | 111          | 16         | 37.3        | 116        | 40             | 5                   | 1                                 | 7.4             |                        | Headache, abdominal pain   | °°° , ° , ^ , H , J , W , °° (s) |                                              | 08/09/2013          | HYP                         |
| <b>NYS-206</b> | 64           | F      | YES                | 100/64         | 50       | 15           | 103          | 14         | 39.7        | 192        | 64             | 5                   | 2                                 | 0.1             |                        | Shivers, vomiting          | * , ° , *** , ~ , ~ (s)          | Traditional herbs                            | 18/9/2013           | RD                          |
| <b>NYS-217</b> | 64           | F      | NO                 | 100/68         | 51       | 17           | 103          | 17         | 38.4        | 144        | 28             | 4                   | 1                                 | 1.4             |                        | Headache, vomiting         | ° , ^ , H , (s)                  |                                              | 25/9/2013           | PR                          |
| <b>NYS-92</b>  | 46           | M      | YES                | 100/80         | 47       | 12           | 100          | 16         | 39.34       | 108        | 26             | 5                   | 4                                 | 6.64            |                        | Prostration                | ° , ^ , *** , ~ (s)              |                                              | 09/12/2012          | HYP                         |

\* - cough; \*\* - diarrhea; \*\*\* - signs of dehydration; ^ - splenomegaly; ~ - dry mucus membrane; ^^ - breathlessness; ^^^ - loss of conscious; ~ - convulsions (number); ~ - indrawing of intercostal spaces; ° - is patient prostrated; °° - nasal flaring ( ) - depth of breathing (n-normal, s-shallow); °°° - black urine; H- hepatomegaly; J - jaundice; W - wheezes; NA - not assessed; HC - head circumference; MUAC - mid-upper arm circumference; CM - cerebral malaria; HYP - hyperparasitemia; RD - respiratory distress; SA - severe anemia; PR - prostration; FC - febrile convulsions; NUD - Severe Malaria Non Ultra Descriptus

Table S4. Lipids detected in plasma samples in the presented study and p(corr) values from the OPLS-DA models between studied groups of samples and OPLS-parasitaemia model for severe samples. In bold marked compounds significant according to the model, based on jack-knifing confidence intervals. Sign of p(corr) vector is given in relation to infected individuals (mild, severe or all cases) and higher parasitaemia values.

| Compound  | Molecular mass * | Molecular formula | Mild versus controls | Severe versus controls | Infected versus control | Parasitaemia in severe cases |
|-----------|------------------|-------------------|----------------------|------------------------|-------------------------|------------------------------|
| TAG(38:0) | 666.578          | C41 H78 O6        | -0.32                | -0.38                  | -0.42                   | 0.61                         |
| TAG(40:1) | 692.596          | C43 H80 O6        | -0.27                | -0.50                  | <b>-0.44</b>            | 0.23                         |
| TAG(40:0) | 694.609          | C43 H82 O6        | -0.36                | -0.39                  | -0.44                   | 0.45                         |
| TAG(42:2) | 718.613          | C45 H82 O6        | -0.33                | -0.42                  | -0.42                   | 0.11                         |
| TAG(42:1) | 720.627          | C45 H84 O6        | -0.32                | -0.46                  | -0.44                   | 0.36                         |
| TAG(42:0) | 722.641          | C45 H86 O6        | -0.34                | -0.42                  | -0.45                   | 0.49                         |
| TAG(44:2) | 746.643          | C47 H86 O6        | -0.26                | -0.36                  | -0.35                   | -0.04                        |
| TAG(44:1) | 748.656          | C47 H88 O6        | -0.30                | -0.45                  | -0.44                   | 0.50                         |
| TAG(45:1) | 762.674          | C48 H90 O6        | -0.17                | -0.43                  | <b>-0.32</b>            | 0.04                         |
| TAG(46:3) | 772.659          | C49 H88 O6        | 0.00                 | -0.02                  | -0.01                   | -0.33                        |
| TAG(46:2) | 774.674          | C49 H90 O6        | -0.19                | -0.32                  | -0.30                   | 0.21                         |
| TAG(46:1) | 776.690          | C49 H92 O6        | -0.30                | -0.45                  | -0.43                   | 0.39                         |
| TAG(46:0) | 778.706          | C49 H94 O6        | -0.23                | -0.49                  | <b>-0.40</b>            | 0.39                         |
| TAG(47:0) | 792.722          | C50 H96 O6        | -0.11                | -0.47                  | -0.29                   | 0.08                         |
| TAG(48:4) | 798.675          | C51 H90 O6        | 0.19                 | 0.09                   | 0.16                    | <b>-0.39</b>                 |
| TAG(48:3) | 800.692          | C51 H92 O6        | -0.04                | -0.06                  | -0.06                   | -0.45                        |
| TAG(48:2) | 802.707          | C51 H94 O6        | -0.17                | -0.23                  | -0.23                   | -0.15                        |
| TAG(48:1) | 804.723          | C51 H96 O6        | -0.12                | -0.26                  | -0.23                   | 0.01                         |
| TAG(48:0) | 806.738          | C51 H98 O6        | 0.15                 | 0.15                   | 0.09                    | -0.46                        |
| TAG(49:2) | 816.722          | C52 H96 O6        | 0.03                 | -0.31                  | -0.14                   | -0.34                        |
| TAG(49:1) | 818.737          | C52 H98 O6        | 0.04                 | -0.33                  | -0.14                   | -0.29                        |
| TAG(49:0) | 820.756          | C52 H100 O6       | 0.04                 | -0.31                  | -0.14                   | -0.24                        |
| TAG(50:5) | 824.691          | C53 H92 O6        | 0.15                 | 0.27                   | 0.25                    | <b>-0.58</b>                 |
| TAG(50:4) | 826.707          | C53 H94 O6        | 0.25                 | 0.31                   | 0.30                    | <b>-0.67</b>                 |
| TAG(50:3) | 828.723          | C53 H96 O6        | 0.40                 | 0.42                   | <b>0.40</b>             | <b>-0.67</b>                 |
| TAG(50:2) | 830.739          | C53 H98 O6        | 0.41                 | 0.44                   | <b>0.41</b>             | <b>-0.67</b>                 |
| TAG(50:1) | 832.755          | C53 H100 O6       | 0.35                 | 0.38                   | 0.31                    | -0.57                        |
| TAG(50:0) | 834.770          | C53 H102 O6       | 0.20                 | 0.12                   | 0.10                    | -0.43                        |
| TAG(51:2) | 844.754          | C54 H100 O6       | 0.22                 | 0.02                   | 0.07                    | -0.59                        |
| TAG(52:7) | 848.692          | C55 H92 O6        | <b>0.35</b>          | 0.44                   | 0.40                    | <b>-0.50</b>                 |
| TAG(52:5) | 852.723          | C55 H96 O6        | <b>0.58</b>          | <b>0.68</b>            | <b>0.61</b>             | <b>-0.78</b>                 |
| TAG(52:4) | 854.740          | C55 H98 O6        | <b>0.67</b>          | <b>0.75</b>            | <b>0.68</b>             | <b>-0.90</b>                 |
| TAG(52:3) | 856.755          | C55 H100 O6       | <b>0.69</b>          | <b>0.74</b>            | <b>0.67</b>             | <b>-0.90</b>                 |
| TAG(52:2) | 858.771          | C55 H102 O6       | 0.53                 | <b>0.57</b>            | <b>0.51</b>             | <b>-0.80</b>                 |
| TAG(52:1) | 860.786          | C55 H104 O6       | 0.36                 | 0.34                   | 0.28                    | <b>-0.57</b>                 |
| TAG(53:5) | 866.739          | C56 H98 O6        | <b>0.62</b>          | <b>0.65</b>            | <b>0.60</b>             | <b>-0.79</b>                 |
| TAG(54:9) | 872.686          | C57 H92 O6        | <b>0.51</b>          | 0.48                   | <b>0.48</b>             | -0.45                        |
| TAG(54:8) | 874.707          | C57 H94 O6        | <b>0.56</b>          | <b>0.62</b>            | <b>0.59</b>             | <b>-0.83</b>                 |
| TAG(53:1) | 874.800          | C56 H106 O6       | 0.14                 | -0.15                  | -0.03                   | -0.51                        |
| TAG(54:7) | 876.722          | C57 H96 O6        | 0.45                 | <b>0.59</b>            | <b>0.50</b>             | <b>-0.63</b>                 |
| TAG(54:6) | 878.739          | C57 H98 O6        | <b>0.80</b>          | <b>0.82</b>            | <b>0.78</b>             | <b>-0.77</b>                 |
| TAG(54:5) | 880.755          | C57 H100 O6       | <b>0.59</b>          | <b>0.67</b>            | <b>0.60</b>             | <b>-0.87</b>                 |
| TAG(54:4) | 882.771          | C57 H102 O6       | <b>0.63</b>          | <b>0.66</b>            | <b>0.61</b>             | <b>-0.90</b>                 |
| TAG(54:3) | 884.787          | C57 H104 O6       | <b>0.58</b>          | <b>0.58</b>            | <b>0.55</b>             | <b>-0.87</b>                 |
| TAG(54:2) | 886.802          | C57 H106 O6       | <b>0.53</b>          | <b>0.55</b>            | <b>0.49</b>             | <b>-0.85</b>                 |
| TAG(54:1) | 888.815          | C57 H108 O6       | 0.23                 | 0.15                   | 0.14                    | <b>-0.65</b>                 |
| TAG(56:8) | 902.737          | C59 H98 O6        | <b>0.74</b>          | <b>0.74</b>            | <b>0.70</b>             | <b>-0.80</b>                 |
| TAG(56:7) | 904.754          | C59 H100 O6       | <b>0.77</b>          | <b>0.79</b>            | <b>0.75</b>             | <b>-0.84</b>                 |
| TAG(56:5) | 908.785          | C59 H104 O6       | <b>0.66</b>          | <b>0.72</b>            | <b>0.66</b>             | <b>-0.93</b>                 |
| TAG(56:4) | 910.803          | C59 H106 O6       | <b>0.53</b>          | <b>0.57</b>            | <b>0.51</b>             | <b>-0.74</b>                 |

|             |         |                 |              |              |              |              |
|-------------|---------|-----------------|--------------|--------------|--------------|--------------|
| TAG(56:3)   | 912.818 | C59 H108 O6     | <b>0.44</b>  | <b>0.47</b>  | <b>0.43</b>  | <b>-0.73</b> |
| TAG(56:2)   | 914.831 | C59 H110 O6     | 0.18         | 0.32         | 0.24         | <b>-0.78</b> |
| TAG(56:1)   | 916.843 | C59 H112 O6     | -0.06        | 0.03         | -0.03        | -0.63        |
| TAG(58:11)  | 924.724 | C61 H96 O6      | <b>0.66</b>  | <b>0.62</b>  | <b>0.59</b>  | -0.58        |
| TAG(58:10)  | 926.738 | C61 H98 O6      | <b>0.73</b>  | <b>0.69</b>  | <b>0.66</b>  | -0.66        |
| TAG(58:9)   | 928.753 | C61 H100 O6     | <b>0.76</b>  | <b>0.74</b>  | <b>0.71</b>  | <b>-0.77</b> |
| TAG(58:6)   | 934.804 | C61 H106 O6     | <b>0.65</b>  | <b>0.75</b>  | <b>0.68</b>  | <b>-0.90</b> |
| TAG(58:3)   | 940.843 | C61 H112 O6     | -0.03        | 0.15         | 0.09         | -0.41        |
| TAG(58:1)   | 944.872 | C61 H116 O6     | -0.13        | 0.02         | -0.06        | <b>-0.62</b> |
| TAG(60:3)   | 968.876 | C63 H116 O6     | -0.02        | 0.15         | 0.09         | <b>-0.43</b> |
| TAG(60:2)   | 970.890 | C63 H118 O6     | -0.15        | 0.10         | 0.01         | <b>-0.47</b> |
| LPC(16:1)   | 493.318 | C24 H48 N O7 P  | <b>-0.77</b> | <b>-0.85</b> | <b>-0.83</b> | 0.48         |
| LPC(16:0)   | 495.334 | C24 H50 N O7 P  | <b>-0.78</b> | <b>-0.82</b> | <b>-0.82</b> | 0.56         |
| LPC(17:0)   | 509.349 | C25 H52 N O7 P  | -0.46        | -0.28        | -0.32        | -0.43        |
| LPC(18:2)   | 519.333 | C26 H50 N O7 P  | <b>-0.86</b> | <b>-0.88</b> | <b>-0.89</b> | 0.45         |
| LPC(18:1)   | 521.349 | C26 H52 N O7 P  | <b>-0.83</b> | <b>-0.86</b> | <b>-0.87</b> | 0.53         |
| LPC(18:0)   | 523.365 | C26 H54 N O7 P  | <b>-0.81</b> | <b>-0.85</b> | <b>-0.85</b> | 0.58         |
| LPC(20:5)   | 541.316 | C28 H48 N O7 P  | <b>-0.88</b> | <b>-0.90</b> | <b>-0.91</b> | 0.48         |
| LPC(20:4)   | 543.333 | C28 H50 N O7 P  | <b>-0.83</b> | <b>-0.86</b> | <b>-0.86</b> | 0.49         |
| LPC(22:6)   | 567.333 | C30 H50 N O7 P  | <b>-0.74</b> | <b>-0.72</b> | <b>-0.74</b> | 0.52         |
| PC(32:1)    | 731.549 | C40 H78 N O8 P  | <b>0.65</b>  | <b>0.71</b>  | <b>0.64</b>  | <b>-0.74</b> |
| PC(32:0)    | 733.563 | C40 H80 N O8 P  | <b>0.78</b>  | <b>0.83</b>  | <b>0.77</b>  | <b>-0.78</b> |
| PC(O-34:3)  | 741.567 | C42 H80 N O7 P  | -0.32        | <b>-0.36</b> | -0.36        | <b>-0.54</b> |
| PC(34:3)    | 755.548 | C42 H78 N O8 P  | 0.43         | <b>0.63</b>  | <b>0.49</b>  | <b>-0.82</b> |
| PC(34:2)    | 757.564 | C42 H80 N O8 P  | <b>0.54</b>  | <b>0.64</b>  | <b>0.58</b>  | <b>-0.94</b> |
| PC(34:1)    | 759.580 | C42 H82 N O8 P  | <b>0.67</b>  | <b>0.76</b>  | <b>0.68</b>  | <b>-0.89</b> |
| PC(34:0)    | 761.594 | C42 H84 N O8 P  | <b>0.40</b>  | <b>0.48</b>  | <b>0.41</b>  | <b>-0.74</b> |
| PC(O-36:6)  | 763.548 | C44 H78 N O7 P  | -0.19        | 0.05         | -0.07        | -0.42        |
| PC(O-36:4)  | 767.583 | C44 H82 N O7 P  | -0.07        | -0.17        | -0.14        | -0.51        |
| PC(O-36:3)  | 769.597 | C44 H84 N O7 P  | -0.02        | <b>0.36</b>  | 0.20         | <b>-0.95</b> |
| PC(35:2)    | 771.579 | C43 H82 N O8 P  | 0.17         | 0.19         | 0.13         | <b>-0.58</b> |
| PC(36:6)    | 777.535 | C44 H76 N O8 P  | 0.41         | <b>0.61</b>  | <b>0.45</b>  | <b>-0.81</b> |
| PC(36:5)    | 779.548 | C44 H78 N O8 P  | 0.24         | <b>0.42</b>  | 0.25         | <b>-0.67</b> |
| PC(36:4)    | 781.564 | C44 H80 N O8 P  | <b>0.64</b>  | <b>0.66</b>  | <b>0.63</b>  | <b>-0.90</b> |
| PC(36:3)    | 783.580 | C44 H82 N O8 P  | -0.14        | -0.11        | -0.14        | <b>-0.68</b> |
| PC(36:2)    | 785.596 | C44 H84 N O8 P  | 0.28         | <b>0.41</b>  | 0.36         | <b>-0.92</b> |
| PC(O-38:7)  | 789.567 | C46 H80 N O7 P  | 0.01         | 0.07         | 0.01         | -0.39        |
| PC(O-38:5)  | 793.598 | C46 H84 N O7 P  | <b>0.53</b>  | <b>0.52</b>  | <b>0.52</b>  | <b>-0.75</b> |
| PC(O-38:4)  | 795.614 | C46 H86 N O7 P  | 0.00         | -0.15        | -0.08        | -0.60        |
| PC(37:2)    | 799.608 | C45 H86 N O8 P  | -0.28        | -0.42        | -0.31        | -0.24        |
| PC(38:7)    | 803.547 | C46 H78 N O8 P  | <b>0.60</b>  | <b>0.64</b>  | <b>0.62</b>  | <b>-0.91</b> |
| PC(38:6)    | 805.564 | C46 H80 N O8 P  | 0.26         | 0.24         | 0.24         | -0.51        |
| PC(38:5)    | 807.580 | C46 H82 N O8 P  | 0.34         | <b>0.46</b>  | <b>0.38</b>  | <b>-0.80</b> |
| PC(38:4)    | 809.596 | C46 H84 N O8 P  | <b>0.55</b>  | <b>0.56</b>  | <b>0.55</b>  | <b>-0.77</b> |
| PC(38:3)    | 811.610 | C46 H86 N O8 P  | -0.43        | <b>-0.45</b> | -0.47        | -0.44        |
| PC(38:2)    | 813.626 | C46 H88 N O8 P  | -0.14        | -0.11        | -0.12        | <b>-0.66</b> |
| PC(40:8)    | 829.559 | C48 H80 N O8 P  | 0.17         | 0.17         | 0.16         | -0.55        |
| PC(40:7)    | 831.577 | C48 H82 N O8 P  | 0.06         | -0.08        | -0.04        | <b>-0.80</b> |
| PC(40:6)    | 833.595 | C48 H84 N O8 P  | 0.09         | 0.08         | 0.08         | -0.32        |
| PC(40:5)    | 835.610 | C48 H86 N O8 P  | 0.18         | 0.30         | 0.25         | <b>-0.82</b> |
| PC(40:4)    | 837.625 | C48 H88 N O8 P  | -0.26        | -0.30        | -0.28        | -0.49        |
| SM(tot32:1) | 674.538 | C37 H75 N2 O6 P | -0.09        | -0.18        | -0.14        | -0.07        |
| SM(tot33:1) | 688.552 | C38 H77 N2 O6 P | 0.24         | 0.12         | 0.13         | -0.53        |
| SM(tot34:2) | 700.552 | C39 H77 N2 O6 P | 0.27         | <b>0.44</b>  | 0.36         | <b>-0.81</b> |
| SM(tot34:1) | 702.570 | C39 H79 N2 O6 P | 0.19         | <b>0.36</b>  | 0.26         | <b>-0.66</b> |
| SM(tot34:0) | 704.584 | C39 H81 N2 O6 P | 0.21         | 0.29         | 0.20         | -0.19        |
| SM(tot35:1) | 716.583 | C40 H81 N2 O6 P | 0.23         | 0.17         | 0.14         | -0.45        |
| SM(tot36:2) | 728.584 | C41 H81 N2 O6 P | 0.27         | <b>0.49</b>  | <b>0.34</b>  | <b>-0.62</b> |
| SM(tot36:1) | 730.600 | C41 H83 N2 O6 P | 0.28         | <b>0.48</b>  | <b>0.34</b>  | -0.38        |
| SM(tot36:0) | 732.613 | C41 H85 N2 O6 P | <b>0.51</b>  | <b>0.59</b>  | <b>0.49</b>  | -0.19        |



|             |         |                 |             |              |              |              |
|-------------|---------|-----------------|-------------|--------------|--------------|--------------|
| SM(tot38:2) | 756.611 | C43 H85 N2 O6 P | -0.32       | -0.24        | <b>-0.27</b> | 0.01         |
| SM(tot39:2) | 770.634 | C44 H87 N2 O6 P | <b>0.32</b> | 0.43         | 0.30         | <b>-0.82</b> |
| SM(tot40:1) | 786.663 | C45 H91 N2 O6 P | -0.12       | <b>-0.30</b> | -0.25        | -0.14        |
| SM(tot41:4) | 794.626 | C46 H87 N2 O6 P | <b>0.49</b> | <b>0.54</b>  | <b>0.51</b>  | <b>-0.75</b> |
| SM(tot42:2) | 812.679 | C47 H93 N2 O6 P | -0.33       | <b>-0.39</b> | <b>-0.39</b> | -0.24        |
| PE(34:0)    | 719.548 | C39 H78 N O8 P  | <b>0.61</b> | <b>0.56</b>  | <b>0.57</b>  | -0.41        |
| PG(34:0)    | 750.543 | C40 H79 O10 P   | -0.25       | <b>-0.54</b> | -0.42        | <b>0.52</b>  |

TAG – triacylglyceride, PC – phosphatidylcholine, LPC lysophosphatidylcholine, SM – sphingomyelin,  
PE – phosphatidylethanolamine, PS – phosphatidylserine, PG – phosphatidylglycerol, PI – phosphatidylinositol  
\* - determined experimentally;

Table S5. Compounds significant according to one-way ANOVA with post-hoc Tukey's HSD test showing which from the studied groups had significantly different means(p-values below 0.05) for the comparison of studied groups of samples.

| Compound    | One-way ANOVA p value | Tukey's HSD test               |
|-------------|-----------------------|--------------------------------|
| TG(50:3)    | 2.20E-02              | Severe-Controls                |
| TG(50:2)    | 9.21E-03              | Mild-Controls; Severe-Controls |
| TG(50:1)    | 2.34E-02              | Severe-Controls                |
| TG(52:7)    | 2.63E-02              | Severe-Controls                |
| TG(52:5)    | 3.81E-03              | Severe-Controls                |
| TG(52:4)    | 5.37E-04              | Mild-Controls; Severe-Controls |
| TG(52:3)    | 1.35E-04              | Mild-Controls; Severe-Controls |
| TG(52:2)    | 1.85E-03              | Mild-Controls; Severe-Controls |
| TG(53:5)    | 1.05E-02              | Severe-Controls                |
| TG(54:9)    | 3.91E-02              | Mild-Controls; Severe-Controls |
| TG(54:8)    | 1.62E-03              | Mild-Controls; Severe-Controls |
| TG(54:6)    | 7.61E-06              | Mild-Controls; Severe-Controls |
| TG(54:5)    | 4.93E-03              | Severe-Controls                |
| TG(54:4)    | 1.61E-03              | Mild-Controls; Severe-Controls |
| TG(54:3)    | 3.49E-03              | Mild-Controls; Severe-Controls |
| TG(54:2)    | 2.93E-03              | Mild-Controls; Severe-Controls |
| TG(56:8)    | 3.47E-04              | Mild-Controls; Severe-Controls |
| TG(56:7)    | 4.87E-06              | Mild-Controls; Severe-Controls |
| TG(56:5)    | 1.03E-04              | Mild-Controls; Severe-Controls |
| TG(56:4)    | 8.12E-03              | Severe-Controls                |
| TG(56:3)    | 4.45E-02              | Severe-Controls                |
| TG(58:11)   | 2.10E-03              | Mild-Controls; Severe-Controls |
| TG(58:10)   | 8.95E-04              | Mild-Controls; Severe-Controls |
| TG(58:9)    | 1.80E-04              | Mild-Controls; Severe-Controls |
| TG(58:6)    | 5.01E-05              | Mild-Controls; Severe-Controls |
| LPC(16:1)   | 6.04E-09              | Mild-Controls; Severe-Controls |
| LPC(16:0)   | 4.37E-07              | Mild-Controls; Severe-Controls |
| LPC(18:2)   | 4.62E-12              | Mild-Controls; Severe-Controls |
| LPC(18:1)   | 2.14E-09              | Mild-Controls; Severe-Controls |
| LPC(18:0)   | 1.83E-10              | Mild-Controls; Severe-Controls |
| LPC(20:5)   | 2.05E-12              | Mild-Controls; Severe-Controls |
| LPC(20:4)   | 2.56E-09              | Mild-Controls; Severe-Controls |
| LPC(22:6)   | 1.54E-04              | Mild-Controls; Severe-Controls |
| PC(32:1)    | 1.68E-05              | Mild-Controls; Severe-Controls |
| PC(32:0)    | 5.96E-08              | Mild-Controls; Severe-Controls |
| PC(O-34:3)  | 5.14E-03              | Mild-Controls; Severe-Controls |
| PC(34:3)    | 9.14E-04              | Mild-Controls; Severe-Controls |
| PC(34:2)    | 1.19E-03              | Mild-Controls; Severe-Controls |
| PC(34:1)    | 1.22E-06              | Mild-Controls; Severe-Controls |
| PC(34:0)    | 9.33E-03              | Mild-Controls; Severe-Controls |
| PC(36:6)    | 2.17E-03              | Mild-Controls; Severe-Controls |
| PC(36:5)    | 4.97E-02              | Severe-Controls                |
| PC(36:4)    | 9.81E-05              | Mild-Controls; Severe-Controls |
| PC(O-38:5)  | 1.14E-02              | Mild-Controls; Severe-Controls |
| PC(38:7)    | 7.88E-05              | Mild-Controls; Severe-Controls |
| PC(38:5)    | 7.88E-03              | Mild-Controls; Severe-Controls |
| PC(38:4)    | 8.95E-03              | Mild-Controls; Severe-Controls |
| PC(38:3)    | 7.65E-03              | Mild-Controls; Severe-Controls |
| SM(tot36:2) | 2.54E-02              | Severe-Controls                |
| SM(tot36:1) | 6.06E-03              | Severe-Controls                |
| SM(tot36:0) | 4.95E-04              | Mild-Controls; Severe-Controls |
| SM(tot39:2) | 3.39E-02              | Severe-Controls                |
| SM(tot41:4) | 1.76E-02              | Severe-Controls                |
| SM(tot42:2) | 1.03E-02              | Mild-Controls; Severe-Controls |
| PE(34:0)    | 2.30E-04              | Mild-Controls; Severe-Controls |

|          |          |                                |
|----------|----------|--------------------------------|
| TG(50:3) | 2.20E-02 | Severe-Controls                |
| TG(50:2) | 9.21E-03 | Mild-Controls; Severe-Controls |
| TG(50:1) | 2.34E-02 | Severe-Controls                |
| TG(52:7) | 2.63E-02 | Severe-Controls                |
| TG(52:5) | 3.81E-03 | Severe-Controls                |
| TG(52:4) | 5.37E-04 | Mild-Controls; Severe-Controls |
| TG(52:3) | 1.35E-04 | Mild-Controls; Severe-Controls |
| TG(52:2) | 1.85E-03 | Mild-Controls; Severe-Controls |
| TG(53:5) | 1.05E-02 | Severe-Controls                |

Table S6. P-values and fold changes for the compounds significant according to t-test (p-values in t-test below 0.05) for the comparison between infected individuals and controls.

| Compound   | p-value  | Fold change |
|------------|----------|-------------|
| TG(50:3)   | 6.05E-03 | 0.70        |
| TG(50:2)   | 1.39E-03 | 0.68        |
| TG(50:1)   | 1.41E-03 | 0.70        |
| TG(52:7)   | 3.46E-03 | 0.61        |
| TG(52:5)   | 2.11E-04 | 0.56        |
| TG(52:4)   | 5.11E-06 | 0.56        |
| TG(52:3)   | 8.02E-07 | 0.59        |
| TG(52:2)   | 1.47E-04 | 0.67        |
| TG(52:1)   | 6.28E-03 | 0.69        |
| TG(53:5)   | 4.58E-04 | 0.67        |
| TG(54:9)   | 1.34E-03 | 0.60        |
| TG(54:8)   | 1.33E-04 | 0.47        |
| TG(54:7)   | 1.59E-02 | 0.58        |
| TG(54:6)   | 1.52E-08 | 0.32        |
| TG(54:5)   | 2.67E-04 | 0.61        |
| TG(54:4)   | 7.00E-05 | 0.64        |
| TG(54:3)   | 2.76E-04 | 0.68        |
| TG(54:2)   | 1.31E-04 | 0.60        |
| TG(56:8)   | 2.82E-06 | 0.43        |
| TG(56:7)   | 1.54E-08 | 0.43        |
| TG(56:5)   | 1.40E-06 | 0.53        |
| TG(56:4)   | 1.54E-03 | 0.70        |
| TG(56:3)   | 8.43E-03 | 0.68        |
| TG(58:11)  | 1.72E-05 | 0.44        |
| TG(58:10)  | 5.48E-06 | 0.39        |
| TG(58:9)   | 5.92E-07 | 0.37        |
| TG(58:6)   | 2.56E-06 | 0.57        |
| LPC(16:1)  | 2.75E-07 | 2.74        |
| LPC(16:0)  | 1.01E-05 | 3.04        |
| LPC(17:0)  | 4.83E-02 | 1.02        |
| LPC(18:2)  | 2.99E-08 | 4.30        |
| LPC(18:1)  | 1.74E-07 | 3.07        |
| LPC(18:0)  | 6.19E-08 | 3.72        |
| LPC(20:5)  | 6.66E-09 | 3.72        |
| LPC(20:4)  | 7.81E-08 | 2.64        |
| LPC(22:6)  | 3.36E-05 | 2.38        |
| PC(32:1)   | 4.96E-08 | 0.32        |
| PC(32:0)   | 1.07E-10 | 0.36        |
| PC(O-34:3) | 8.95E-03 | 1.38        |
| PC(34:3)   | 5.03E-05 | 0.60        |
| PC(34:2)   | 7.04E-05 | 0.63        |
| PC(34:1)   | 5.75E-09 | 0.46        |
| PC(34:0)   | 3.79E-04 | 0.70        |

|                    |          |      |
|--------------------|----------|------|
| <b>PC(36:6)</b>    | 8.71E-05 | 0.64 |
| <b>PC(36:5)</b>    | 4.39E-03 | 0.66 |
| <b>PC(36:4)</b>    | 7.83E-06 | 0.62 |
| <b>PC(O-38:5)</b>  | 1.71E-03 | 0.69 |
| <b>PC(37:2)</b>    | 1.96E-02 | 1.46 |
| <b>PC(38:7)</b>    | 1.78E-05 | 0.66 |
| <b>PC(38:5)</b>    | 2.11E-03 | 0.74 |
| <b>PC(38:4)</b>    | 9.31E-04 | 0.68 |
| <b>PC(38:3)</b>    | 8.05E-03 | 1.39 |
| <b>SM(tot34:0)</b> | 3.42E-02 | 0.81 |
| <b>SM(tot35:1)</b> | 2.06E-02 | 0.78 |
| <b>SM(tot36:2)</b> | 6.33E-03 | 0.74 |
| <b>SM(tot36:1)</b> | 1.45E-03 | 0.70 |
| <b>SM(tot36:0)</b> | 3.84E-05 | 0.51 |
| <b>SM(tot38:2)</b> | 3.63E-02 | 1.30 |
| <b>SM(tot39:2)</b> | 4.01E-03 | 0.63 |
| <b>SM(tot41:4)</b> | 2.09E-03 | 0.67 |
| <b>SM(tot42:2)</b> | 9.25E-03 | 1.28 |
| <b>PE(34:0)</b>    | 7.96E-05 | 0.97 |

Table S7. Results of the analysis of correlation between lipid species and parasitaemia.

| Compound                                      | Pearson correlation coefficient for all samples | P-value for the Pearson correlation coefficient for all samples | Pearson correlation coefficient for severe cases only | P-value for the Pearson correlation coefficient for severe cases only |
|-----------------------------------------------|-------------------------------------------------|-----------------------------------------------------------------|-------------------------------------------------------|-----------------------------------------------------------------------|
| <i>Positive correlation with parasitaemia</i> |                                                 |                                                                 |                                                       |                                                                       |
| TAG(42:2)                                     |                                                 |                                                                 | 0.541                                                 | 0.017                                                                 |
| TAG(42:1)                                     |                                                 |                                                                 | 0.459                                                 | 0.048                                                                 |
| <i>Negative correlation with parasitaemia</i> |                                                 |                                                                 |                                                       |                                                                       |
| TAG(52:5)                                     |                                                 |                                                                 | -0.467                                                | 0.044                                                                 |
| TAG(52:4)                                     |                                                 |                                                                 | -0.553                                                | 0.014                                                                 |
| TAG(52:3)                                     |                                                 |                                                                 | -0.533                                                | 0.019                                                                 |
| TAG(53:5)                                     |                                                 |                                                                 | -0.534                                                | 0.018                                                                 |
| TAG(56:5)                                     |                                                 |                                                                 | -0.493                                                | 0.032                                                                 |
| PC(32:0)                                      |                                                 |                                                                 | -0.476                                                | 0.040                                                                 |
| PC(34:2)                                      |                                                 |                                                                 | -0.460                                                | 0.048                                                                 |
| PC(34:1)                                      |                                                 |                                                                 | -0.474                                                | 0.040                                                                 |
| PC(O-36:3)                                    |                                                 |                                                                 | -0.518                                                | 0.023                                                                 |
| PC(36:4)                                      |                                                 |                                                                 | -0.572                                                | 0.012                                                                 |
| PC(O-38:5)                                    |                                                 |                                                                 | -0.533                                                | 0.019                                                                 |
| PC(38:7)                                      |                                                 |                                                                 | -0.570                                                | 0.011                                                                 |
| PC(38:4)                                      |                                                 |                                                                 | -0.523                                                | 0.022                                                                 |
| PC(38:2)                                      |                                                 |                                                                 | -0.536                                                | 0.018                                                                 |
| SM(tot41:4)                                   |                                                 |                                                                 | -0.510                                                | 0.026                                                                 |
| PE(34:0)                                      | -0.361                                          | 0.033                                                           | -0.531                                                | 0.019                                                                 |

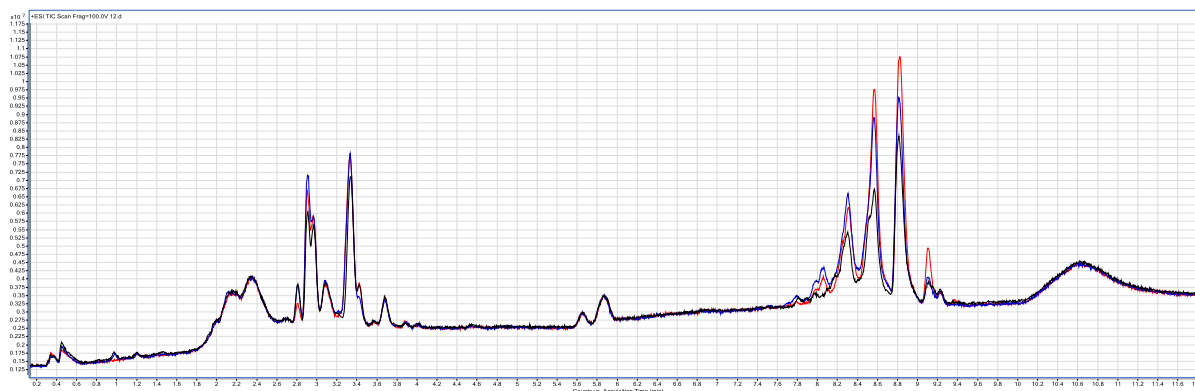

Fig. S1. Example TICs from the controls (black), mild malaria (blue) and severe malaria (red) groups.

A)

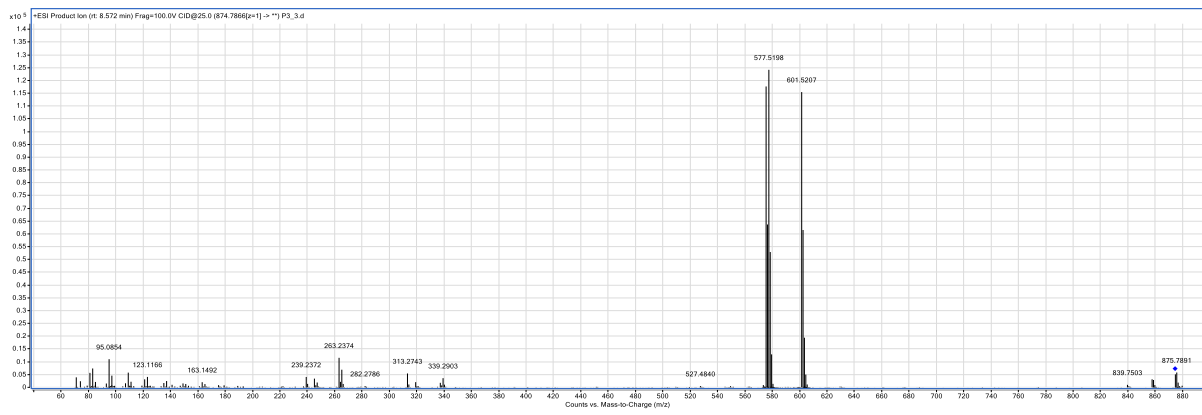

B.

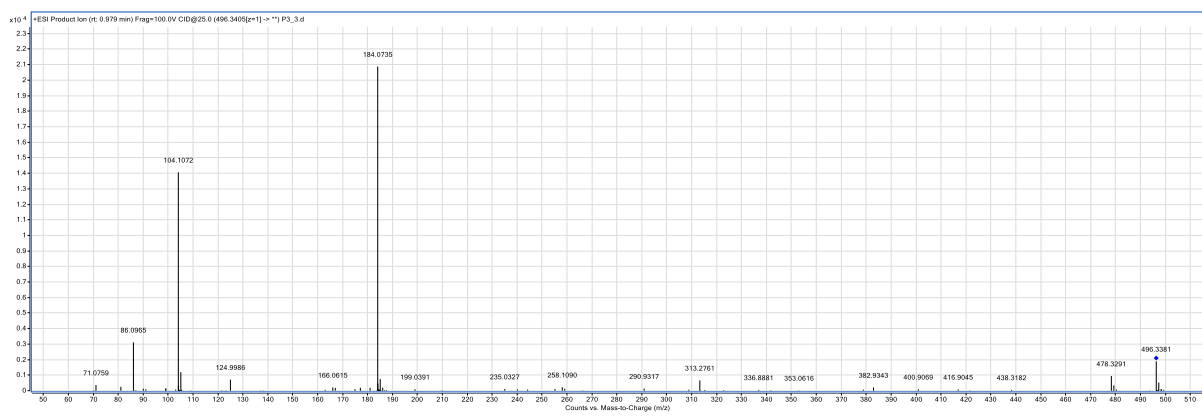

C.

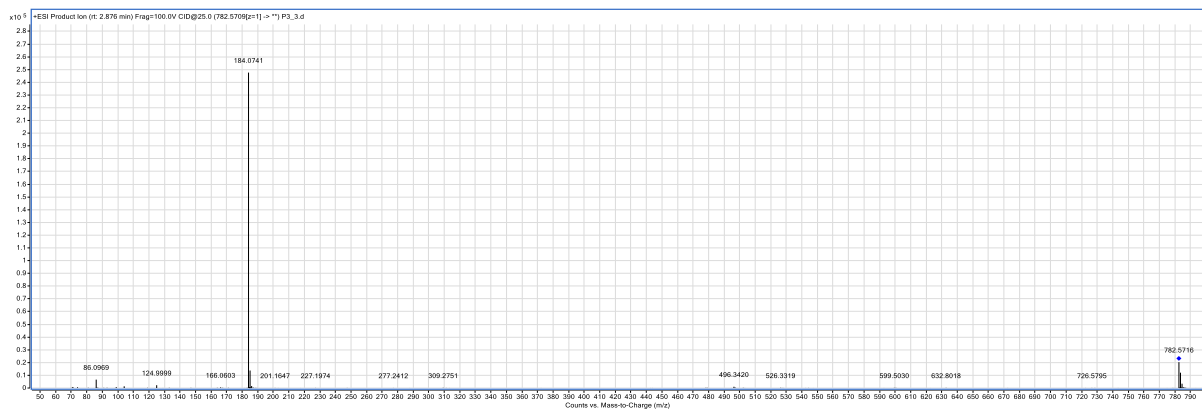

D.

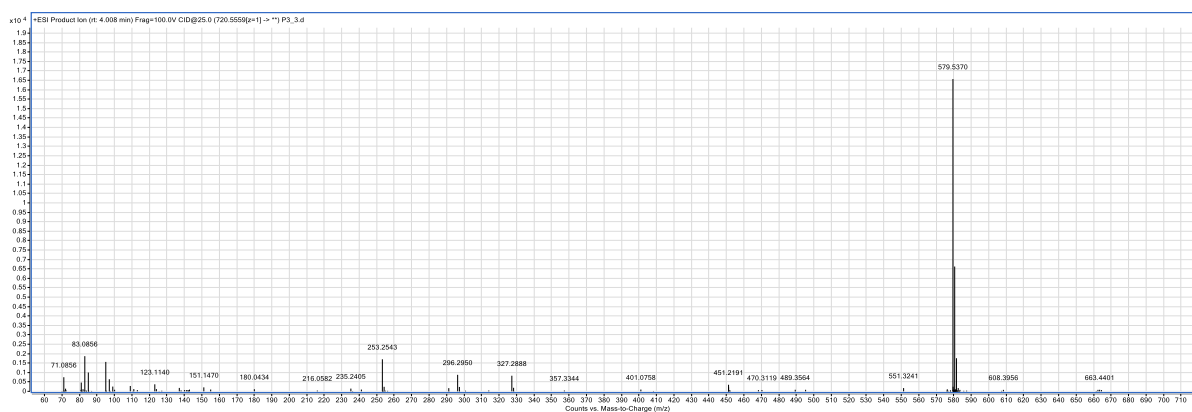

E.

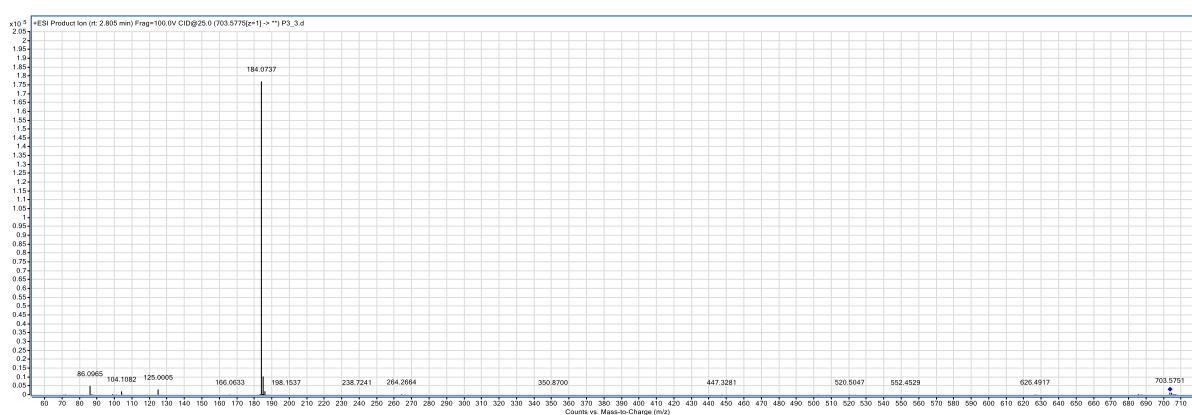

Fig. S2. MS/MS spectra at collision energy 25V of the example molecules from the main detected classes of compounds: A.  $[\text{TAG}(52:3)+\text{NH}_4]^+$  ( $m/z=874.7894$ ) with characteristic ions:  $m/z=239$ ,  $m/z=263$  and  $m/z=265$  corresponding to the fatty acid groups and  $m/z=575.5052$ ,  $m/z=577.5198$  and  $m/z=601.5207$  corresponding to the products of the loss of the fatty acid ammonium salts from the  $[\text{TAG}(52:3)+\text{NH}_4]^+$  ion; B.  $[\text{LPC}(16:0)+\text{H}]^+$  ( $m/z=496.3418$ ) with characteristic ions:  $m/z=184$ ,  $m/z=104$  and  $m/z=86$  corresponding to the phosphocholine group and its daughter ions respectively; C.  $[\text{PC}(36:4)+\text{H}]^+$  ( $m/z=782.5718$ ) with characteristic phosphocholine group ion  $m/z=184$ ; D.  $[\text{PE}(34:0)+\text{H}]^+$  ( $m/z=720.5558$ ) with characteristic neutral loss 141; E.  $[\text{SM}(\text{tot}34:1)+\text{H}]^+$  ( $m/z=703.5778$ ) with characteristic phosphocholine group ion  $m/z=184$ .

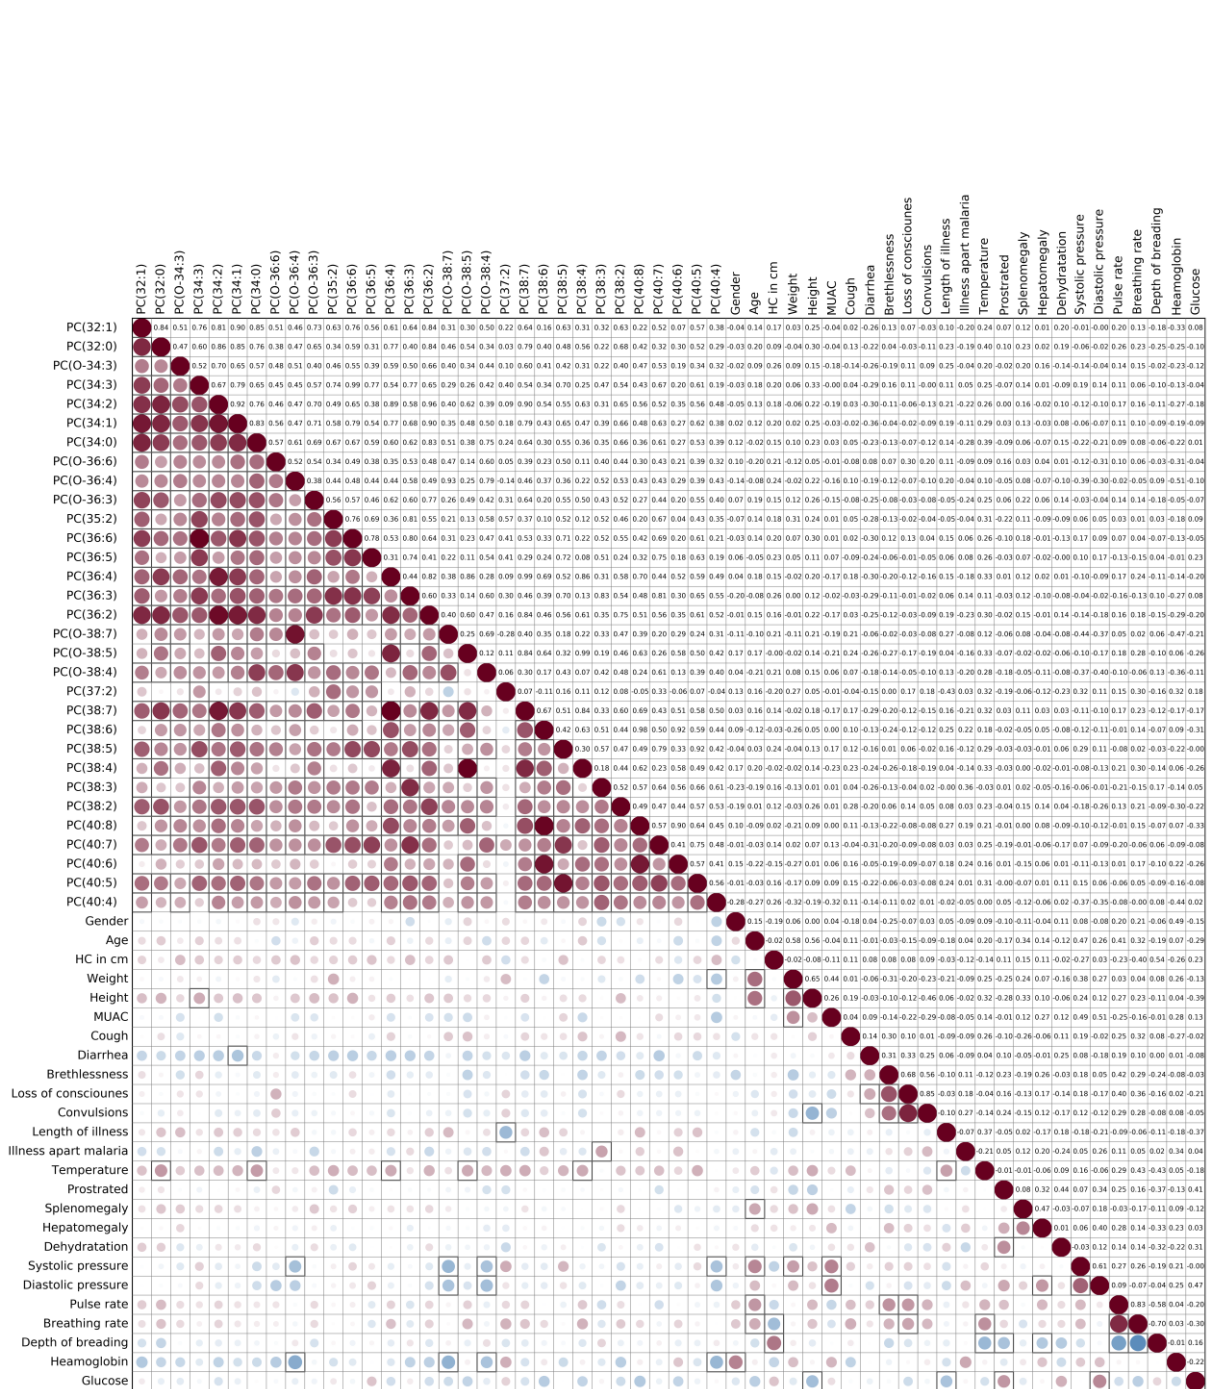

Fig. S3. Plot showing correlation between clinical and personal patient data and phosphatidylcholines for infected individuals. The plot consists of 2 panels: (i) in the lower panel, the color and size of the circles correspond to the strength of the correlation, with increasing circle size and color intensity indicating increasing correlation; shades of blue are used for negative correlations and shades of red for positive correlations; squares indicate correlations that were statistically significant ( $p$ -value  $< 0.05$ ), and (ii) the upper panel shows the corresponding Pearson's correlation coefficients.



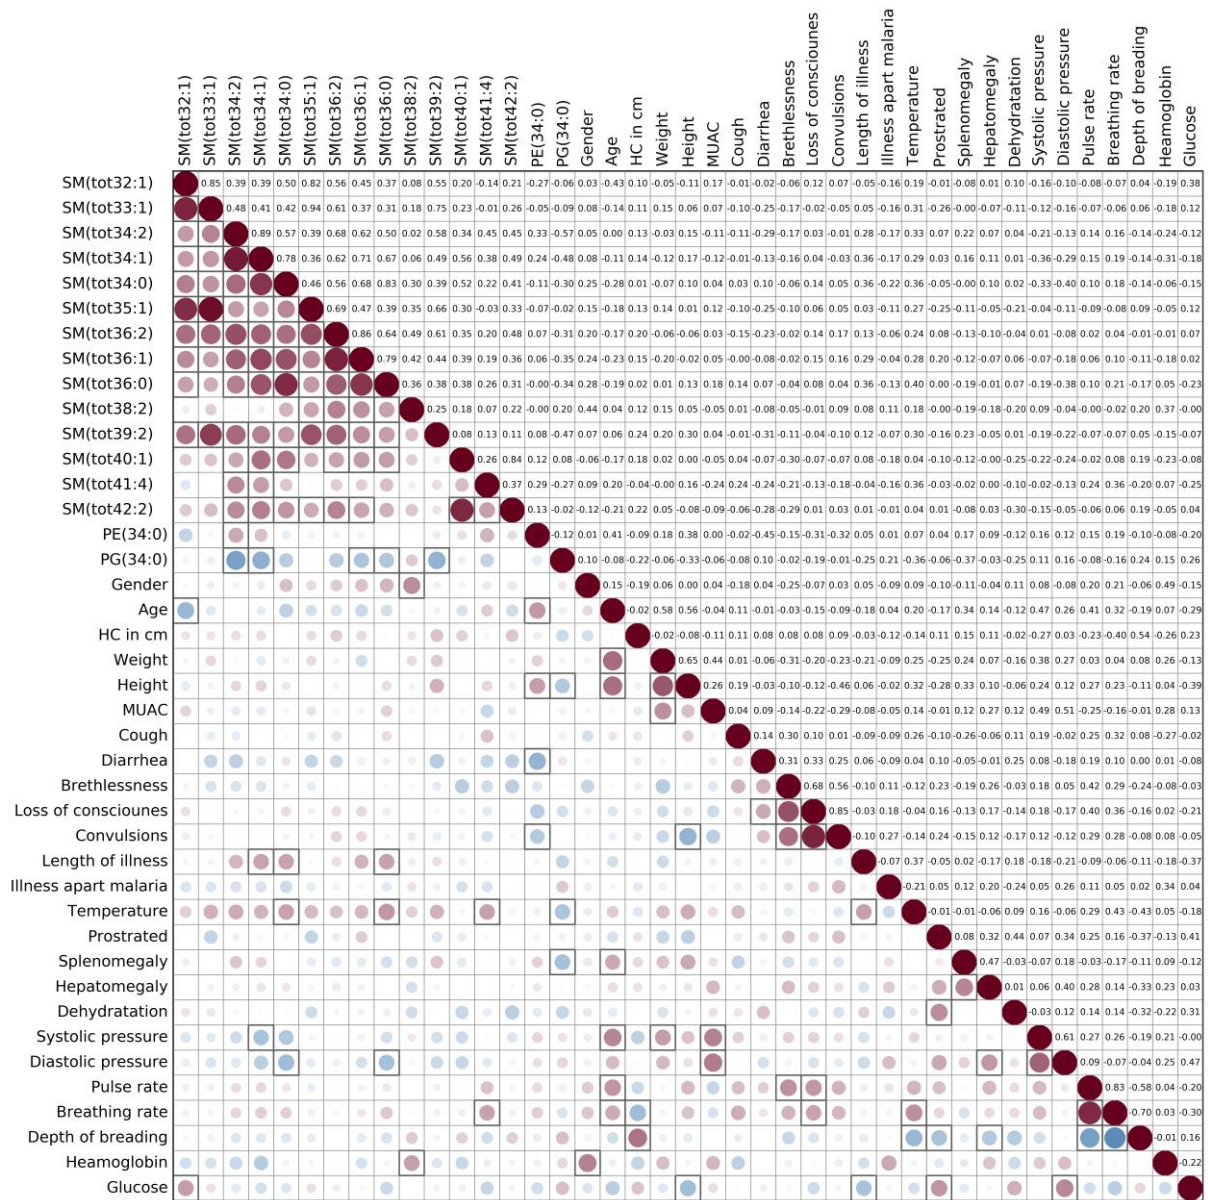

Fig. S4. Plot showing correlation between clinical and personal patient data and detected sphingomyelins and other lipids for infected individuals. The plot consists of 2 panels: (i) in the lower panel, the color and size of the circles correspond to the strength of the correlation, with increasing circle size and color intensity indicating increasing correlation; shades of blue are used for negative correlations and shades of red for positive correlations, squares indicate correlations that were statistically significant ( $p$ -value < 0.05), and (ii) the upper panel shows the corresponding Pearson's correlation coefficients.

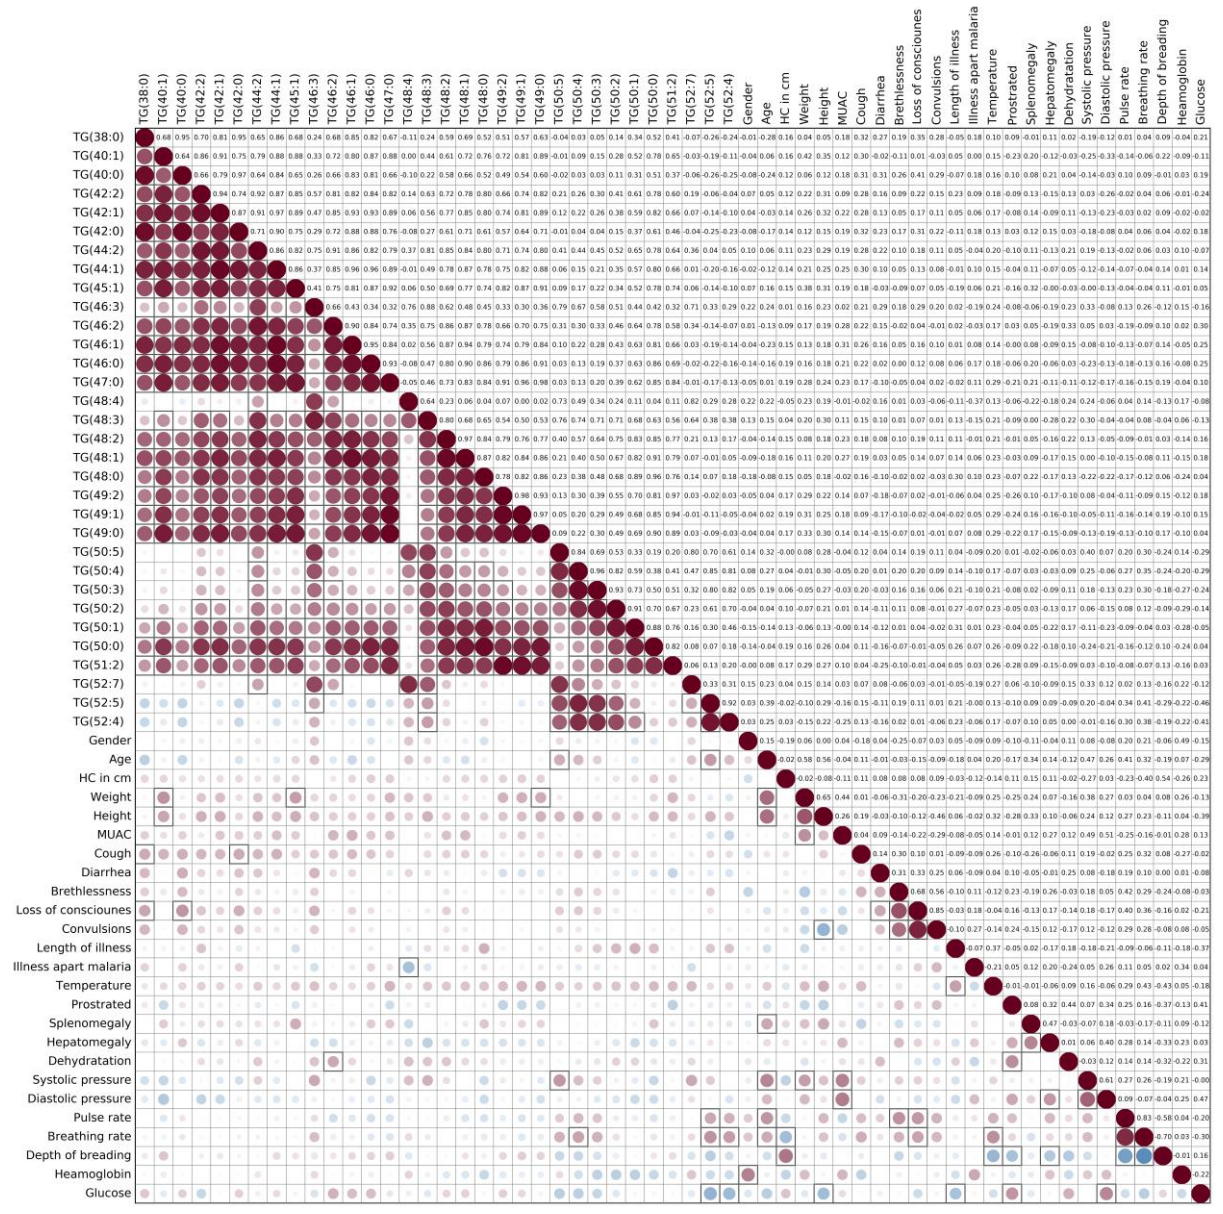

Fig. S5. Plot showing correlation between clinical and personal patient data and triacylglycerols with lower total carbon content for infected individuals. The plot consists of 2 panels: (i) in the lower panel, the color and size of the circles correspond to the strength of the correlation, with increasing circle size and color intensity indicating increasing correlation; shades of blue are used for negative correlations and shades of red for positive correlations, squares indicate correlations that were statistically significant ( $p$ -value  $< 0.05$ ), and (ii) the upper panel shows the corresponding Pearson's correlation coefficients.

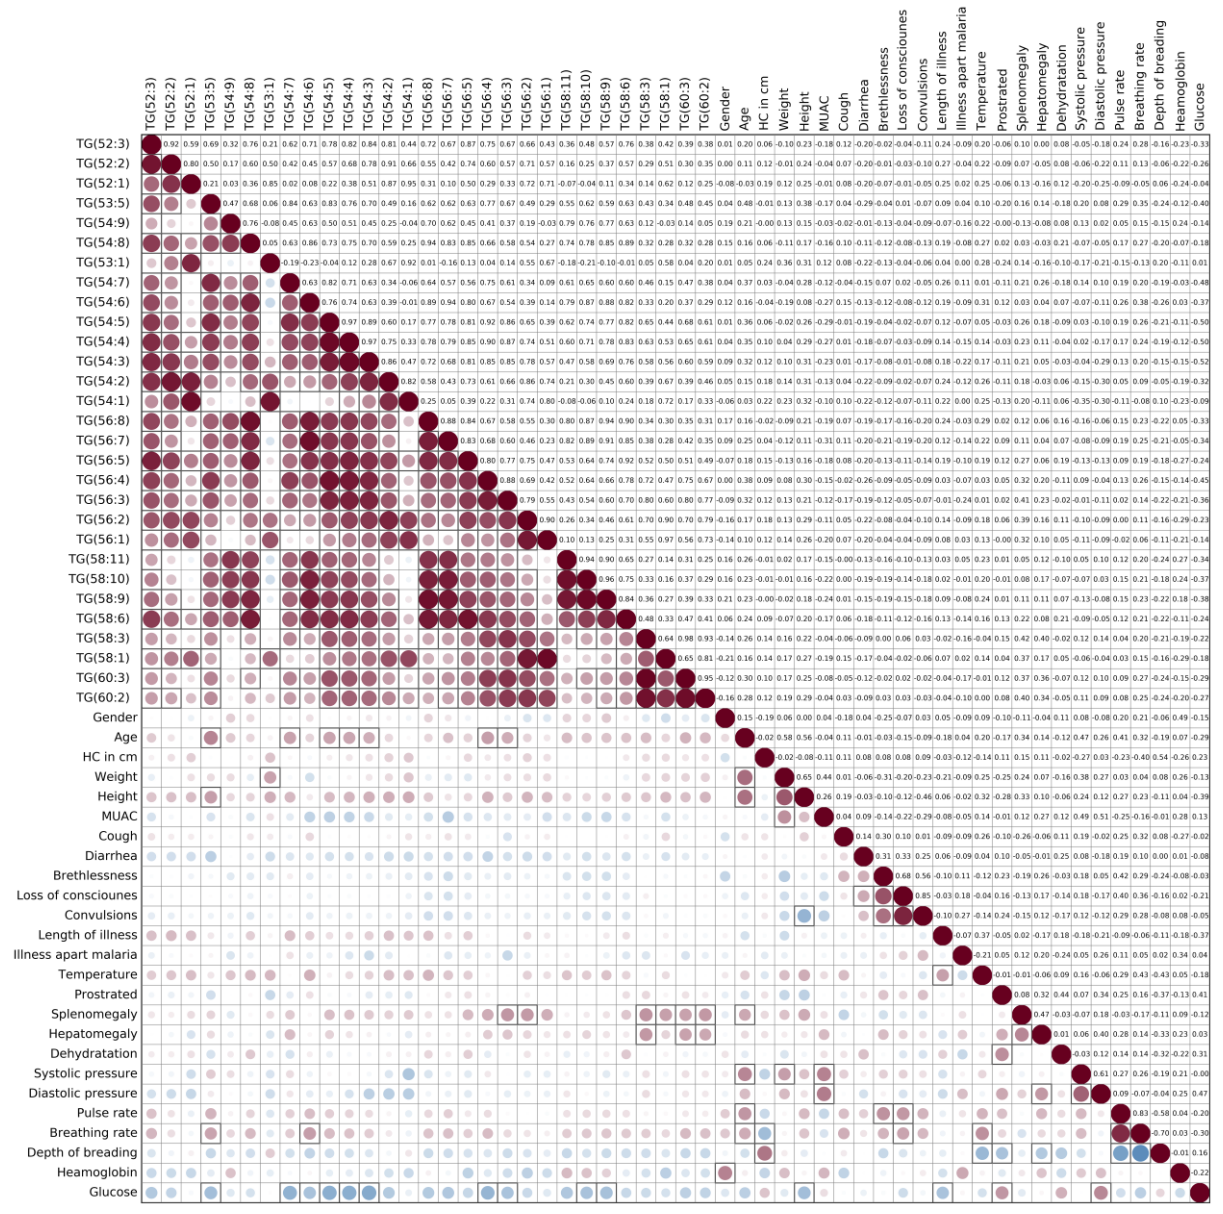

Fig. S6. Plot showing correlation between clinical and personal patient data and triacylglycerols with higher total carbon content for infected individuals. The plot consists of 2 panels: (i) in the lower panel, the color and size of the circles correspond to the strength of the correlation, with increasing circle size and color intensity indicating increasing correlation; shades of blue are used for negative correlations and shades of red for positive correlations, squares indicate correlations that were statistically significant ( $p$ -value  $< 0.05$ ), and (ii) the upper panel shows the corresponding Pearson's correlation coefficients.

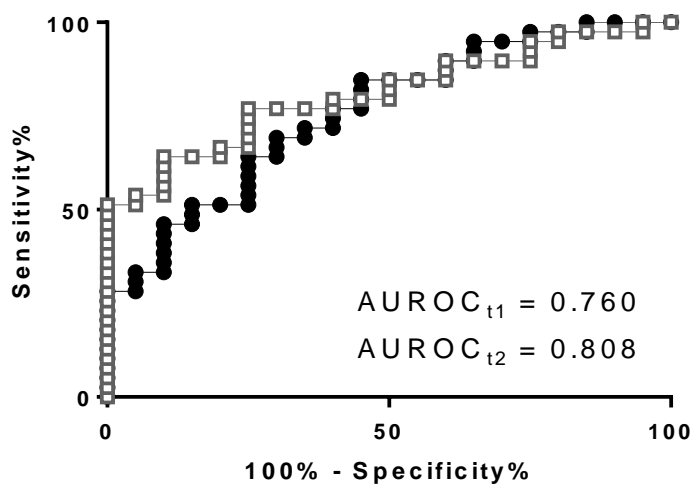

Fig. S7. Diagnostic performance of the PCA analysis; values of cross-validated score vectors from the PCA model on all samples and detected lipid species were taken for the ROC curves calculation: t1 - black dots; AUROC = 0.6344 to 0.8861 at 95% CI,  $p = 0.0012$ ; t2 – white squares; AUROC = 0.6999 to 0.9155 at 95% CI,  $p = 0.0001$ );

A.

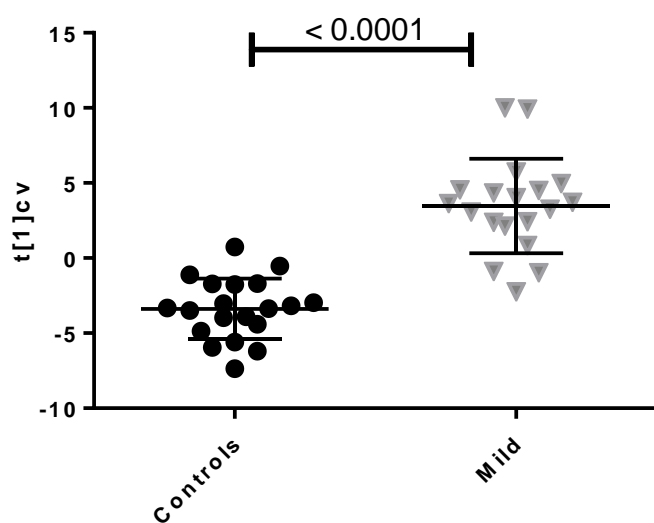

B.

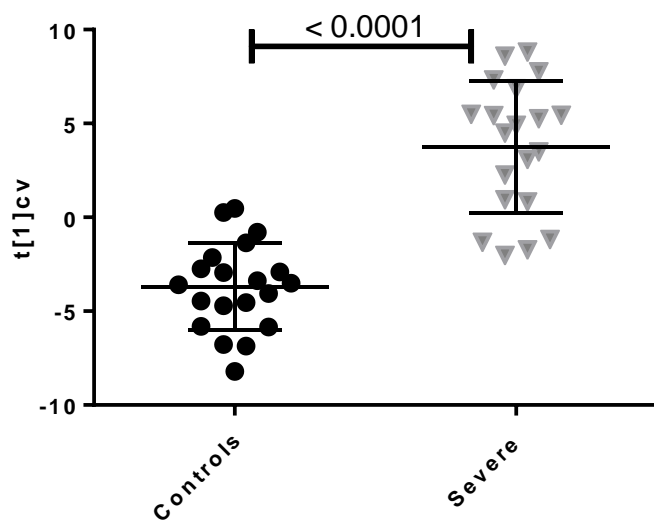

Fig. S8. Separation score plots of patient groups. OPLS-DA score values of the first predictive component ( $t[1]_{cv}$ ) showing the separation between A - mild malaria and controls ( $p < 0.0001$ ), B – severe cases and controls ( $p < 0.0001$ ).

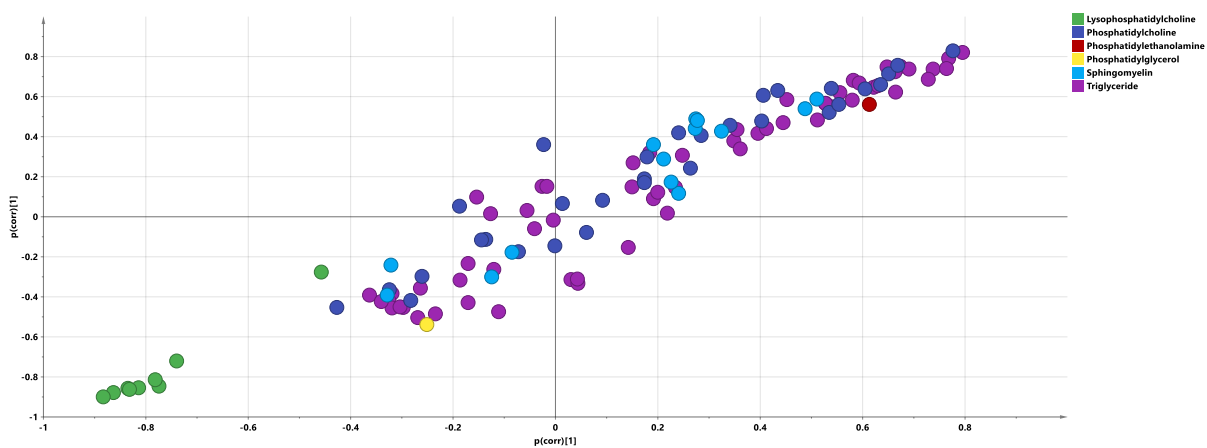

Figure S9. SUS-plot of OPLS-DA correlation loadings ( $p(\text{corr})$ ) from the mild versus controls (X axis) and severe versus controls (Y axis) models. With dots are symbolized lipid species marked in colors according to the chemical subclasses.

A.

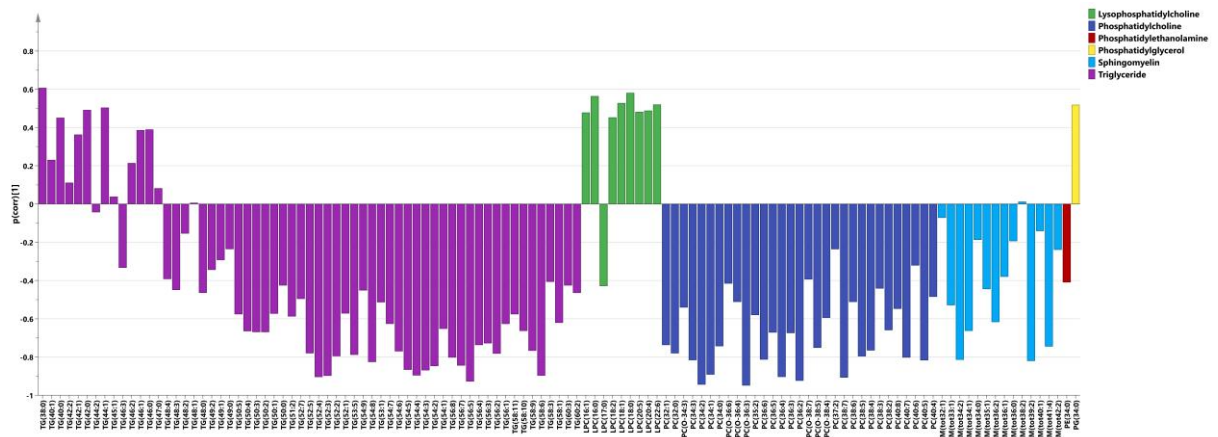

B.

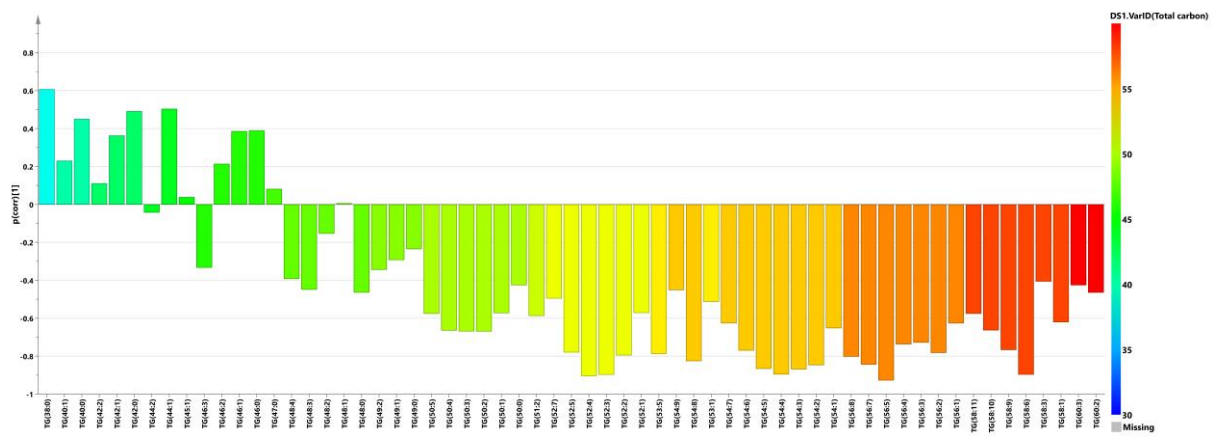

C.

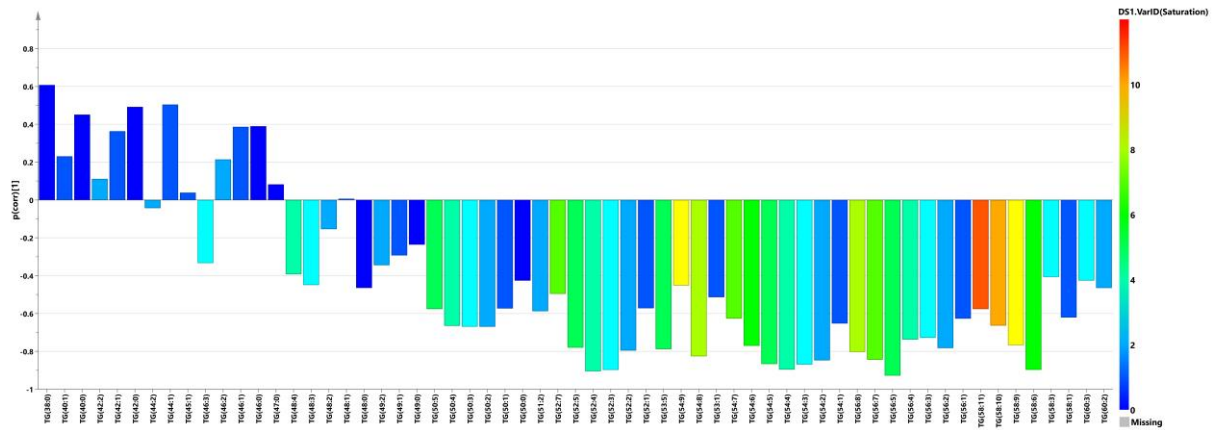

Fig. S10. Triglyceride and LPC subclass spectrum plots correlated to parasitaemia. A. Predictive loading vector (p(corr)) from the OPLS model for severe malaria samples with parasitaemia values as Y; lipid species are colored according to their chemical classes; p(corr) values indicate if the metabolite has a positive or negative correlation with parasitaemia values. B. Predictive loading vector (p(corr)) from the OPLS model for severe malaria samples with parasitaemia values as Y for triglycerides colored according to total carbon length of the triglyceride molecule. C. Predictive loading vector (p(corr)) from the OPLS model for severe malaria samples with parasitaemia values as Y for triglycerides colored according to total number of non-saturated locations in the triglyceride carbon chain.
